# Supplementary material for: Two hybrid transition metal triphosphonates decorated with a tripodal imidazole ligand: synthesis, structures and properties
Source: Royal Society of Chemistry journal article supplement (doi:10.1039/c6dt04363a), 2016-12-12
Supplement: c6dt04363a1.pdf [file c6dt04363a1.pdf]

*Electronic supplementary information (ESI)*

**Two hybrid transition metal triphosphonates decorated with tripodal imidazole ligand: synthesis, structures and properties**

**Guo-Ming Wang,\* Jin-Hua Li, Jie Pan, Zhen-Zhen Xue, Li Wei, Song-De Han, Zhen-Zhen Bao and Zong-Hua Wang**

*College of Chemistry and Chemical Engineering, Collaborative Innovation Center for Marine Biomass Fiber Materials and Textiles, Qingdao University, Shandong 266071, P. R. China.*

---

\*Author to whom correspondence should be addressed. Fax: (+86) 532 85956024. E-mail: [gmgwang\\_pub@163.com](mailto:gmgwang_pub@163.com)

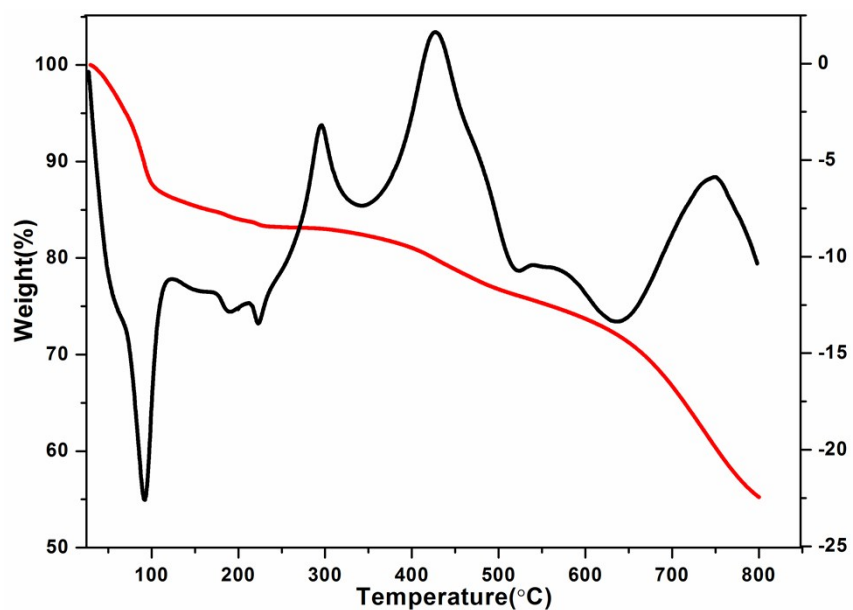

**Fig. S1** TGA (thermogravimetric analysis, red) and DTA (differential thermal analysis, black) curves for **1**.

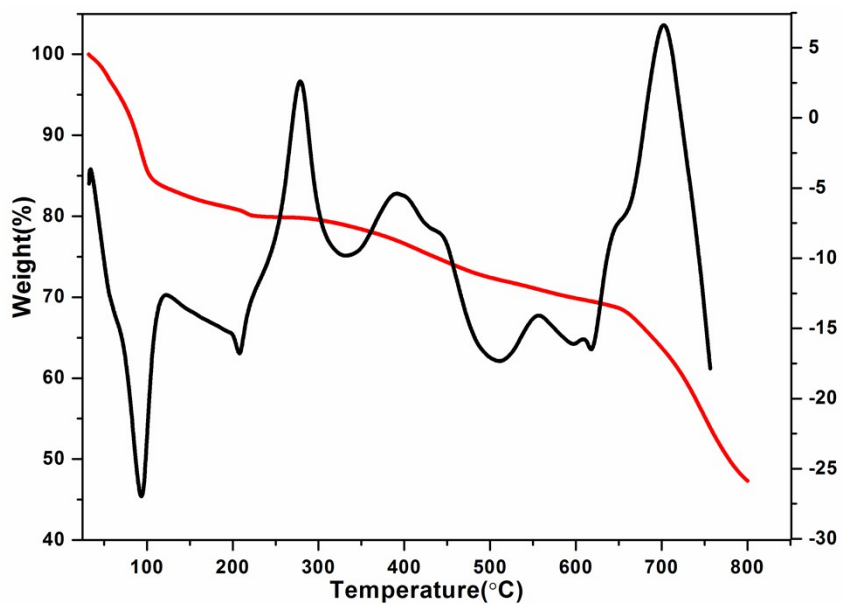

**Fig. S2** TGA (red) and DTA (black) curves for **2**.

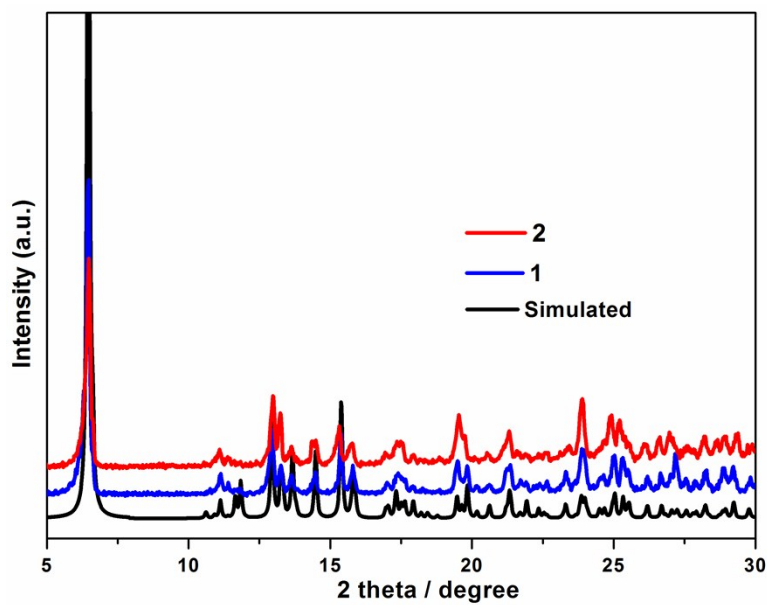

**Fig. S3** PXRD patterns of **1** and **2**.

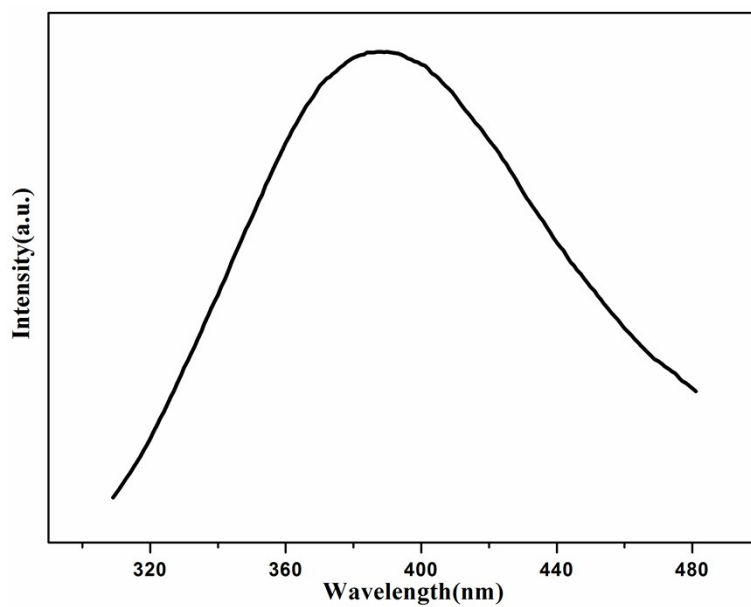

**Fig. S4** Emission spectra of tib ligand in the solid state at room temperature with excitation at 260 nm.

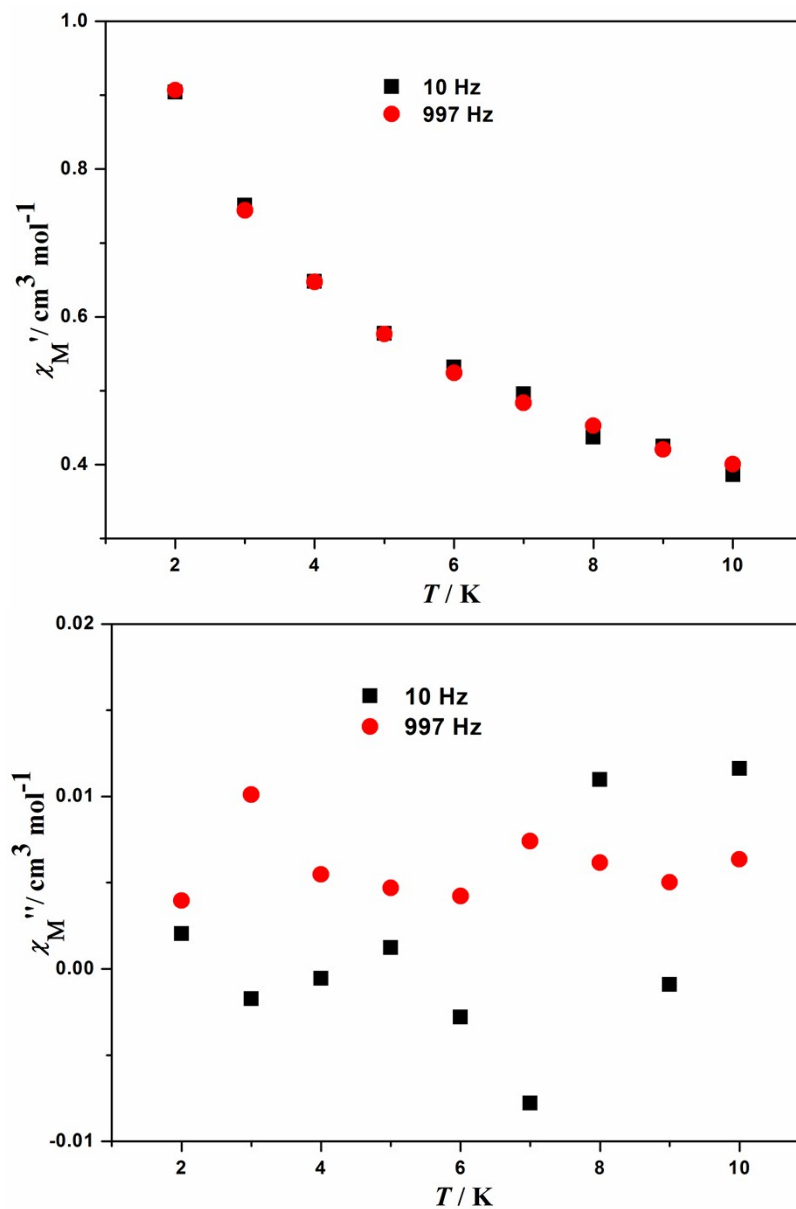

**Fig. S5** Temperature dependence of the AC  $\chi_M$  at 10 and 997 Hz with zero DC field for **2**.

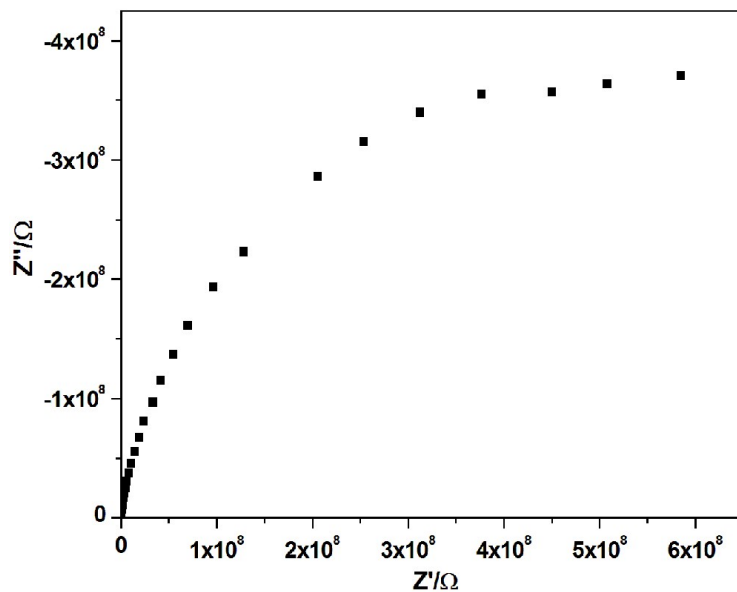

**Fig. S6** Nyquist plot of compound **2** at 20°C and 30% relative humidity.

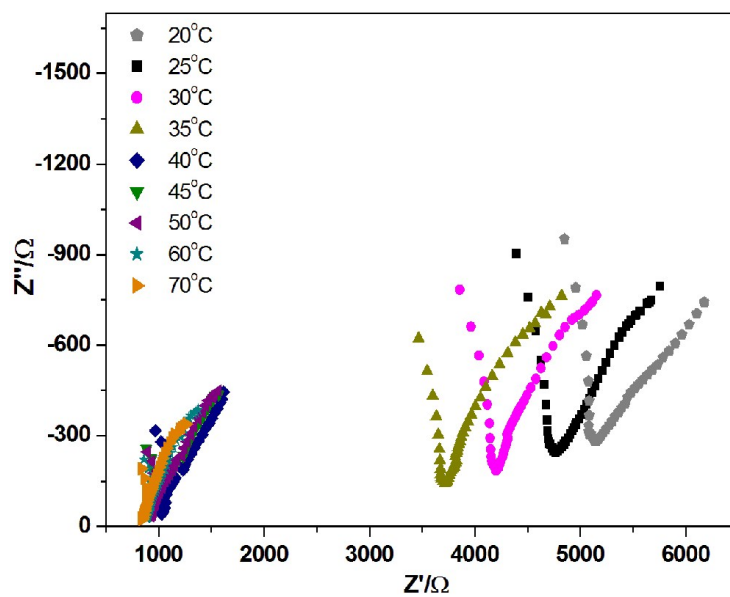

**Fig. S7** The variable-temperature ac impedance spectra of **2** at 100% relative humidity.

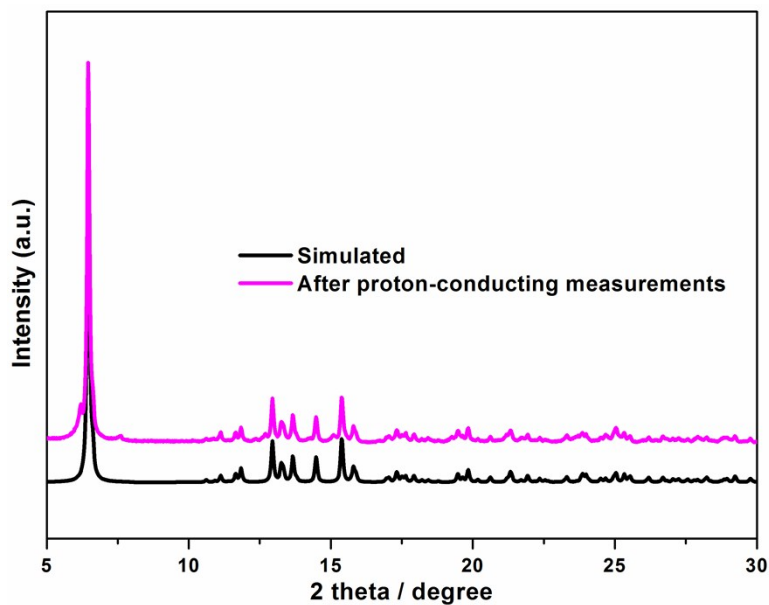

**Fig. S8** The PXRD patterns of **2** after proton-conducting measurements.

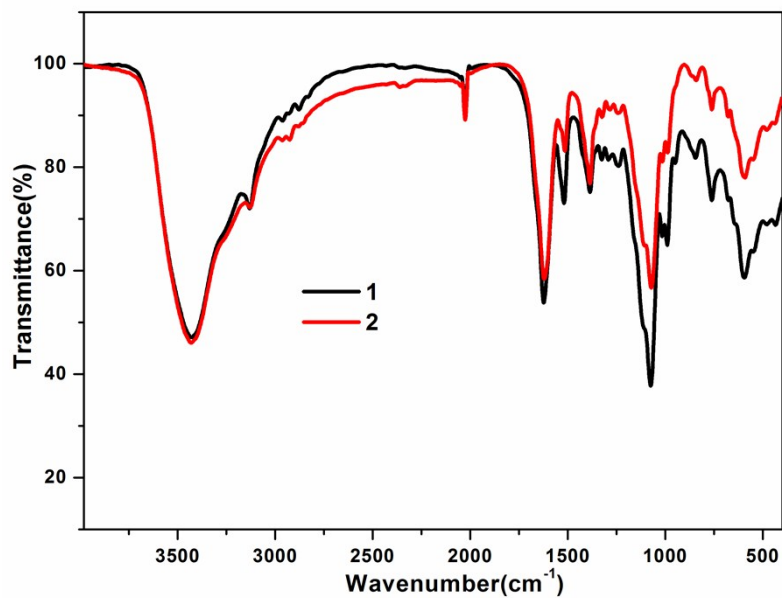

**Fig. S9** IR patterns of **1** and **2**.

**Table S1.** Selected bond lengths (Å) and angles (°) for **1**

|                     |           |                     |           |
|---------------------|-----------|---------------------|-----------|
| Zn(1)-O(7)#6        | 1.926(2)  | Zn(2)-N(7)          | 2.322(3)  |
| Zn(1)-O(8)#5        | 1.938(2)  | Zn(2)-N(2)#1        | 2.058(3)  |
| Zn(1)-O(2)          | 1.945(2)  | Zn(3)-O(1)          | 1.929(2)  |
| Zn(1)#4-O(7)        | 1.926(2)  | Zn(3)#3-O(4)        | 1.940(2)  |
| Zn(1)#5-O(8)        | 1.938(2)  | Zn(3)#4-O(5)        | 1.963(2)  |
| Zn(1)-N(1)          | 2.004(3)  | Zn(3)-O(4)#3        | 1.940(2)  |
| Zn(2)-O(9)          | 1.970(2)  | Zn(3)-O(5)#6        | 1.963(2)  |
| Zn(2)-O(6)          | 2.034(2)  | Zn(3)-N(3)#7        | 1.996(3)  |
| Zn(2)-O(3)          | 2.010(2)  | Zn(3)#2-N(3)        | 1.996(3)  |
| Zn(2)#1-N(2)        | 2.058(3)  |                     |           |
| O(7)#6-Zn(1)-O(8)#5 | 114.22(9) | O(6)-Zn(2)-N(2)#1   | 96.78(1)  |
| O(7)#6-Zn(1)-O(2)   | 109.91(1) | O(9)-Zn(2)-N(7)     | 84.72(8)  |
| O(8)#5-Zn(1)-O(2)   | 104.46(1) | O(3)-Zn(2)-N(7)     | 83.37(8)  |
| O(7)#6-Zn(1)-N(1)   | 98.73(1)  | O(6)-Zn(2)-N(7)     | 82.88(8)  |
| O(8)#5-Zn(1)-N(1)   | 107.33(1) | N(2)#1-Zn(2)-N(7)   | 175.12(9) |
| O(2)-Zn(1)-N(1)     | 122.60(1) | O(1)-Zn(3)-O(4)#3   | 109.37(1) |
| O(9)-Zn(2)-O(3)     | 122.99(9) | O(1)-Zn(3)-O(5)#6   | 116.42(1) |
| O(9)-Zn(2)-O(6)     | 117.80(1) | O(4)#3-Zn(3)-O(5)#6 | 104.28(1) |
| O(3)-Zn(2)-O(6)     | 115.61(1) | O(1)-Zn(3)-N(3)#7   | 102.87(1) |
| O(9)-Zn(2)-N(2)#1   | 99.69(1)  | O(4)#3-Zn(3)-N(3)#7 | 114.14(1) |
| O(3)-Zn(2)-N(2)#1   | 92.43(1)  | O(5)#6-Zn(3)-N(3)#7 | 110.14(1) |

<sup>a</sup>Symmetry codes: #1: -x+2, -y+1, -z; #2: x, y+1, z-1; #3: -x+1, -y, -z+1; #4: x-1, y, z; #5: -x+1, -y+1, -z+1; #6: x+1, y, z; #7: x, y-1, z+1.

**Table S2.** Selected bond lengths (Å) and angles (°) for **2**

|              |           |                     |           |
|--------------|-----------|---------------------|-----------|
| Co(1)-O(9)   | 1.981(2)  | Co(2)-O(1)#3        | 1.969(2)  |
| Co(1)-O(6)   | 2.000(2)  | Co(2)-N(7)#4        | 2.021(3)  |
| Co(1)-O(3)   | 2.028(2)  | Co(3)-O(7)#3        | 1.933(2)  |
| Co(1)-N(5)#1 | 2.080(3)  | Co(3)-O(8)#5        | 1.946(2)  |
| Co(1)-N(1)   | 2.268(3)  | Co(3)-O(5)          | 1.952(2)  |
| Co(2)-O(4)   | 1.940(2)  | Co(3)-N(2)          | 2.016(3)  |
| Co(2)-O(2)#2 | 1.953(2)  |                     |           |
| 123.23(1)    | 123.23(1) | O(4)-Co(2)-O(1)#3   | 117.65(1) |
| 117.33(1)    | 117.33(1) | O(2)#2-Co(2)-O(1)#3 | 105.55(1) |
| 116.64(1)    | 116.64(1) | O(4)-Co(2)-N(7)#4   | 100.75(1) |
| 98.03(1)     | 98.03(1)  | O(2)#2-Co(2)-N(7)#4 | 112.97(1) |
| 92.14(1)     | 92.14(1)  | O(1)#3-Co(2)-N(7)#4 | 108.95(1) |
| 96.57(1)     | 96.57(1)  | O(7)#3-Co(3)-O(8)#5 | 116.11(1) |
| 85.64(9)     | 85.64(9)  | O(7)#3-Co(3)-O(5)   | 109.92(1) |
| 84.07(9)     | 84.07(9)  | O(8)#5-Co(3)-O(5)   | 105.42(1) |
| 83.52(9)     | 83.52(9)  | O(7)#3-Co(3)-N(2)   | 98.19(1)  |
| 175.78(1)    | 175.78(1) | O(8)#5-Co(3)-N(2)   | 106.16(1) |
| 111.17(1)    | 111.17(1) | O(5)-Co(3)-N(2)     | 121.57(1) |

<sup>a</sup>Symmetry codes: #1: -x+1, -y+1, -z; #2: -x, -y, -z+1; #3: x+1, y, z; #4: x, y-1, z+1; #5: -x, -y+1, -z+1; #6: x, y+1, z-1; #7: x-1, y, z.
